# Supplementary material for: Structural Basis of HCV Neutralization by Human Monoclonal Antibodies Resistant to Viral Neutralization Escape
Source: PubMed Central journal article supplement (PMC3656090; doi:10.1371/journal.ppat.1003364), 2013-05-16

**A**

**Complex  
HC84-1**

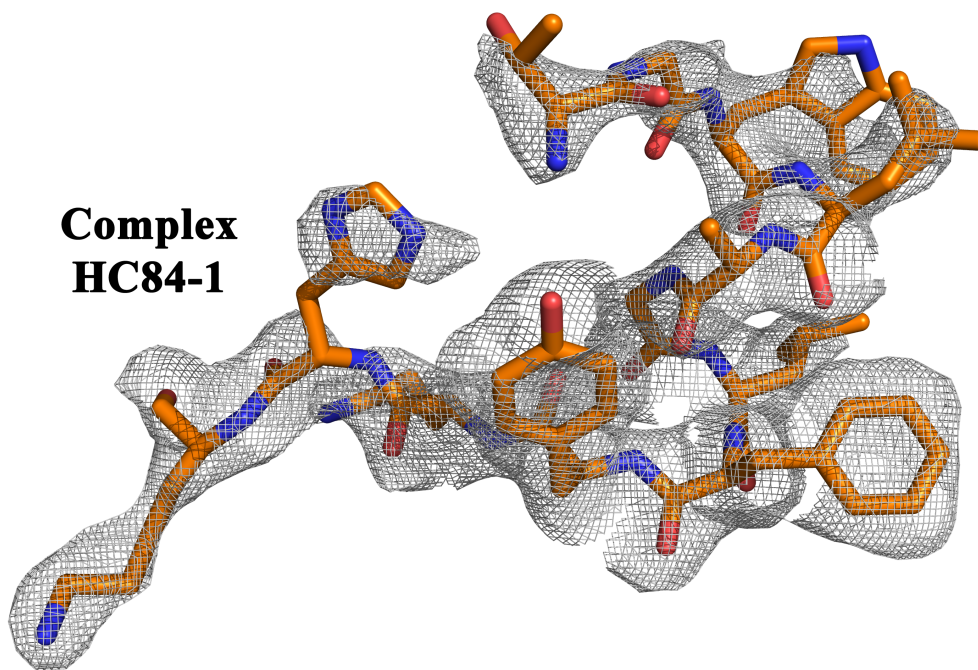

**B**

**Complex  
HC84-27**

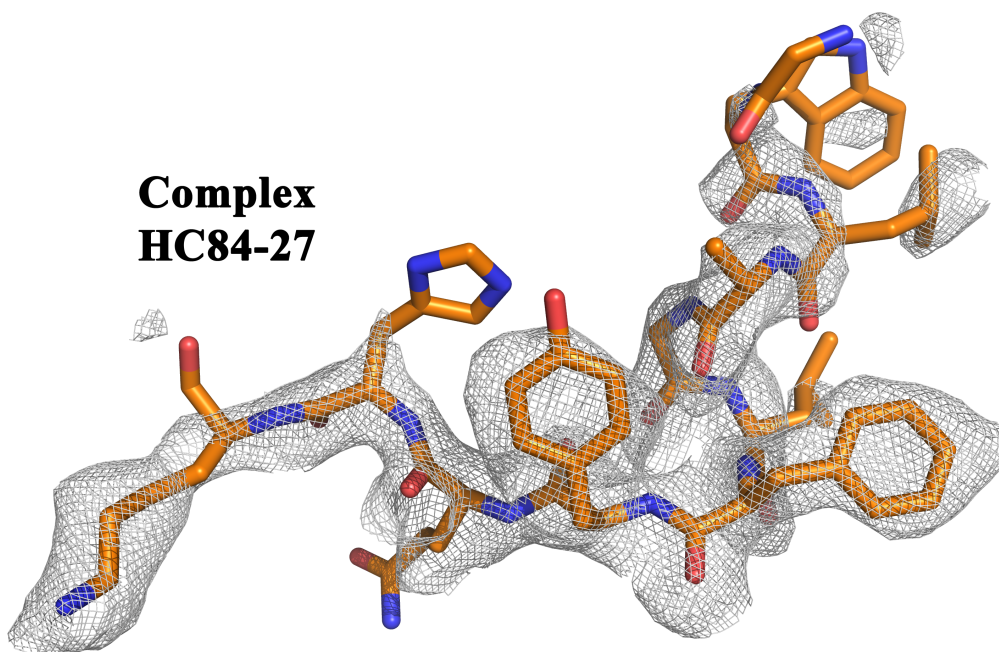

Supplement: ppat.1003364.s001.pdf [file ppat.1003364.s001.pdf]
