# Supplementary material for: Structural Basis of HCV Neutralization by Human Monoclonal Antibodies Resistant to Viral Neutralization Escape
Source: PubMed Central journal article supplement (PMC3656090; doi:10.1371/journal.ppat.1003364), 2013-05-16
Supplement: ppat.1003364.s002.pdf [file ppat.1003364.s002.pdf]

**A**

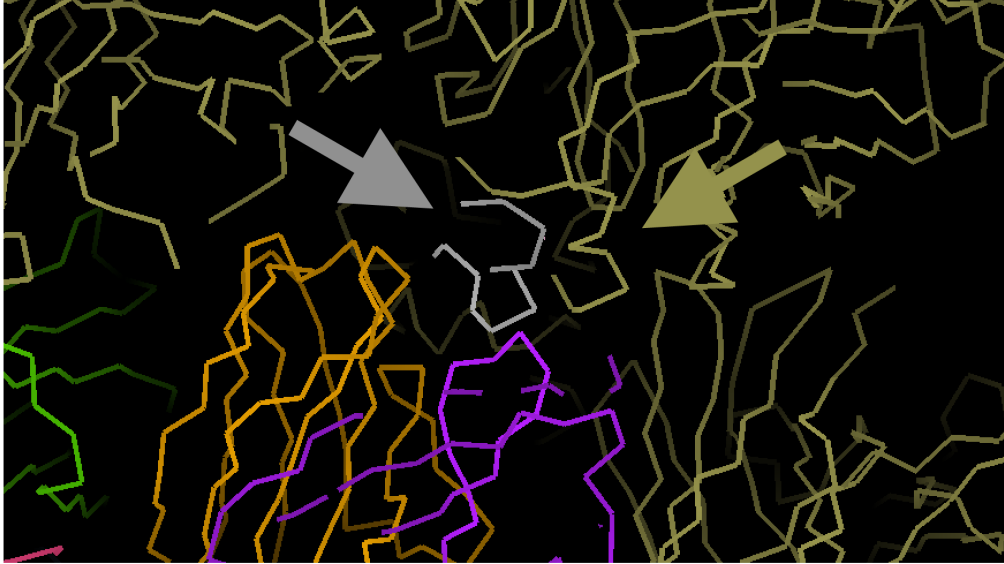

**HC84-1**

**C222<sub>1</sub>**

**B**

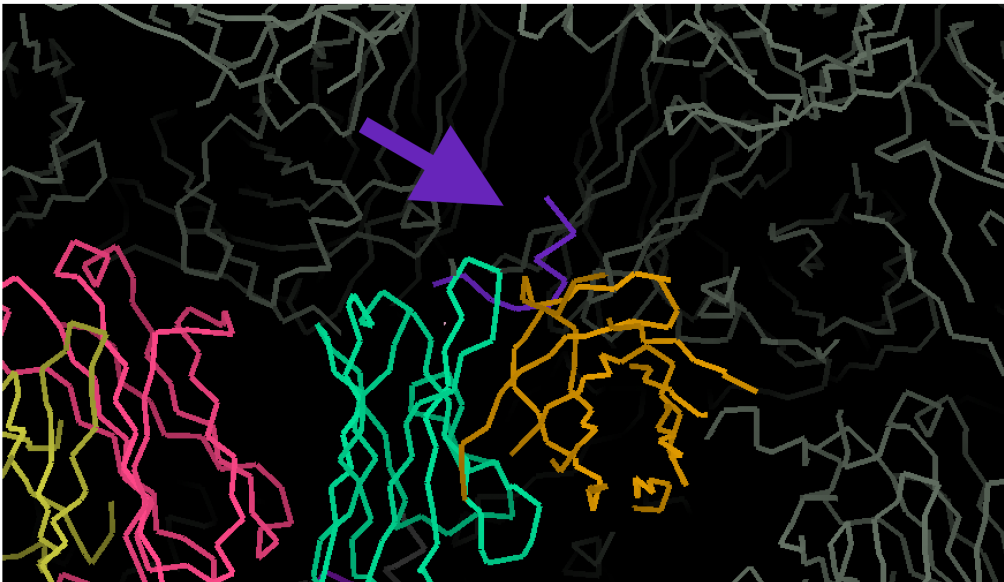

**HC84-27**

**P1**
