# Supplementary material for: Structural Basis of HCV Neutralization by Human Monoclonal Antibodies Resistant to Viral Neutralization Escape
Source: PubMed Central journal article supplement (PMC3656090; doi:10.1371/journal.ppat.1003364), 2013-05-16
Supplement: ppat.1003364.s003.pdf [file ppat.1003364.s003.pdf]

|                       |                  |                                                                                    |     |
|-----------------------|------------------|------------------------------------------------------------------------------------|-----|
|                       | 434              | 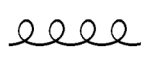 | 446 |
|                       |                  |                                                                                    |     |
| <b>H77 Epitope II</b> | LNTGWLAGLFYQHKFN |                                                                                    |     |
| <b>DPM</b>            | ctcccehceeeccct  |                                                                                    |     |
| <b>DSC</b>            | ccccceeeeeeecc   |                                                                                    |     |
| <b>GOR1</b>           | tttthheeeeettt   |                                                                                    |     |
| <b>GOR3</b>           | ccceehhhheeecc   |                                                                                    |     |
| <b>GOR4</b>           | ccccccceeecccc   |                                                                                    |     |
| <b>HNNC</b>           | hchhhhhheeeccc   |                                                                                    |     |
| <b>PHD</b>            | hhhhhhheeeeeec   |                                                                                    |     |
| <b>Predator</b>       | ccccccchhhhhcc   |                                                                                    |     |
| <b>SIMPA96</b>        | ccccccceeeccccc  |                                                                                    |     |
| <b>SOPM</b>           | cchhhheeeeecccc  |                                                                                    |     |
